# Supplementary material
Source: publisher site journal article supplement (https://www.dovepress.com/get_supplementary_file.php?f=478305.docx)

**Supplementary Table 1.** Distribution of substance use disorder, psychiatric comorbidities, and marital status (n=117)

| Substance | n | % |
| --- | --- | --- |
| Opioids | 26 | 22.3 |
| Ketamine | 13 | 11.1 |
| Amphetamine | 42 | 35.9 |
| MDMA | 10 | 8.5 |
| Marijuana | 10 | 8.5 |
| Multiple substance | 16 | 13.7 |
| Psychiatric comorbidities | n | % |
| Major depressive disorder | 17 | 14.5 |
| Bipolar disorder | 4 | 3.4 |
| Anxiety disorder | 5 | 4.3 |
| Delusional disorder | 1 | 0.9 |
| Sleep disorder | 18 | 15.4 |
| Schizophrenia | 2 | 1.7 |
| Marital status | n | % |
| Single | 80 | 68.4 |
| Married | 22 | 18.8 |
| Divorced | 14 | 12 |
| Widowed | 1 | 0.9 |

MDMA: 3,4-methylenedioxymethamphetamine

**Supplementary Table 2.** Reliability and construct validity of the questionnaires

| Measurement | Cronbach's α | K-M-O value | χ2 of Bartlett's test | Significance of Bartlett's test | Total variance explained % |
| --- | --- | --- | --- | --- | --- |
| SDS | 0.786 | 0.734 | 203.07 | p<0.001 | 55.311 % |
| TAS | 0.785 | 0.823 | 895.47 | p<0.001 | 63.107 % |
| CHQ | 0.892 | 0.865 | 615.46 | p<0.001 | 66.748 % |
| DASES | 0.776 | 0.833 | 936.64 | p<0.001 | 60.945 % |
| APGAR | 0.926 | 0.874 | 450.25 | p<0.001 | 77.291 % |

SDS: Severity of dependence scale; TAS: Toronto Alexithymia Scale-20; CHQ: Chinese Health Questionnaire; DASES: Drug avoidance self-efficacy scale; APGAR: Family Adaptation, Partnership, Growth, Affection, Resolve Index.

**Supplementary Table 3.** Indirect effect of emotional symptoms on the association between alexithymia and substance dependence with multiple adjustment a

| **Outcome variable: emotional symptoms** b | | | | | |
| --- | --- | --- | --- | --- | --- |
| Predictors | β | SE | *p* | LLCI | ULCI |
| Alexithymia | 0.123 | 0.024 | <0.001 | 0.075 | 0.17 |
| **Outcome variable: substance dependence** c | | | | | |
| Predictors | β | SE | *p* | LLCI | ULCI |
| Alexithymia | 0.068 | 0.026 | 0.01 | 0.017 | 0.12 |
| Emotional symptoms | 0.417 | 0.096 | <0.001 | 0.227 | 0.607 |
| **Standardized indirect effect** | β | SE | *p* | LLCI | ULCI |
| Emotional symptoms | 0.181 | 0.045 | - | 0.097 | 0.271 |

LLCI: lower limit of 95% confidence interval

ULCI: upper limit of 95% confidence interval

β: regression coefficient

SE: standard error

a: Adjusted by sex, age, employment status, educational level, marital status, and psychiatric comorbidities.

b: Model F (3, 104) = 9.44; *p* < 0.001

c: Model F (4, 103) = 11.51; *p* < 0.001

**Supplementary Table 4.** Moderated indirect effect of family support on alexithymia divided at three level of family support with multiple adjustment

| Family support | Indirect effect | Bootstrap SE | 95% of CI a |
| --- | --- | --- | --- |
| Mean - S.D. (0.72) | 0.063 | 0.021 | (0.026, 0.109) |
| Mean (4.12) | 0.045 | 0.015 | (0.019, 0.077) |
| Mean + S.D. (7.52) | 0.027 | 0.013 | (0.004, 0.055) |

a= percentile bootstrap confidence interval

**Supplementary Table 5.** Moderated indirect effect of self-efficacy on alexithymia divided at three level of self-efficacy with multiple adjustment

| Self-efficacy | Indirect effect | Bootstrap SE | 95% of CI a |
| --- | --- | --- | --- |
| Mean - S.D. (58.39) | 0.074 | 0.018 | (0.042, 0.112) |
| Mean (72.02) | 0.04 | 0.011 | (0.019, 0.064) |
| Mean + S.D. (85.65) | 0.005 | 0.015 | (-0.029, 0.033) |

a= percentile bootstrap confidence interval

**Supplementary figure 1.** Conceptual model of mediation effect with emotional symptoms


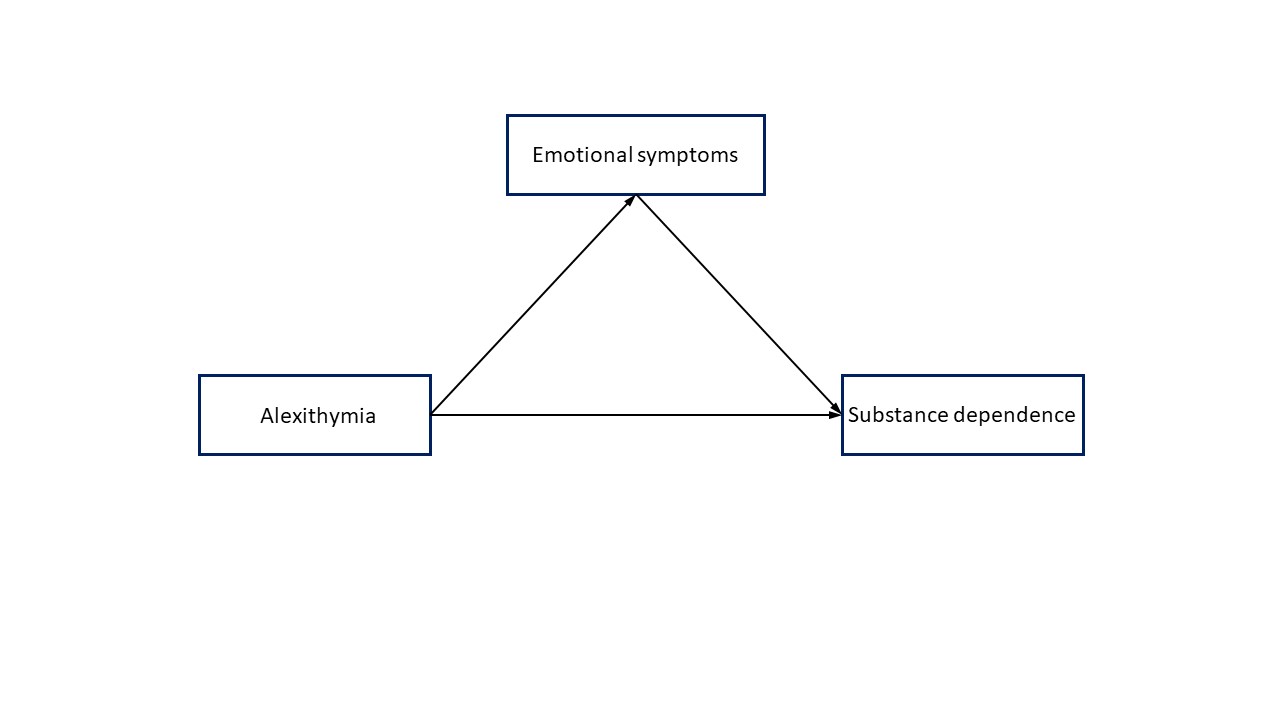


**Supplementary figure 2**. Conceptual model of moderated mediation of family support


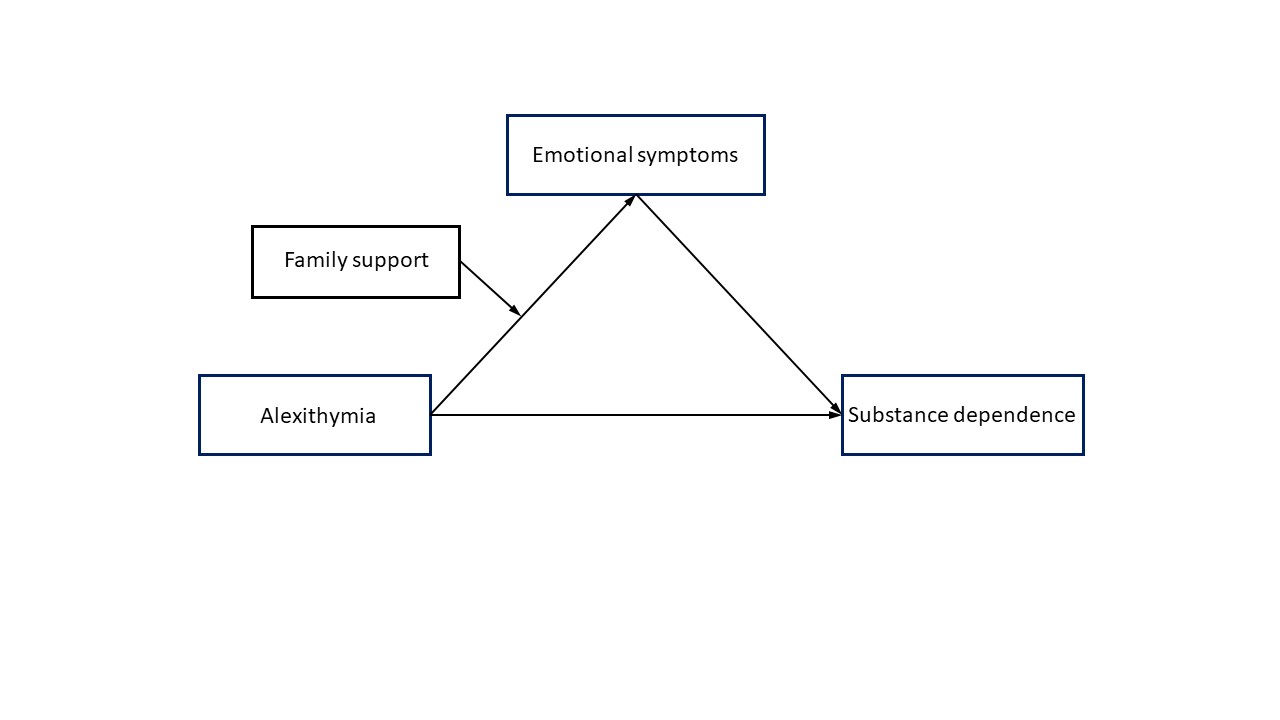


**Supplementary figure 3.** Conceptual model of moderated mediation of self-efficacy


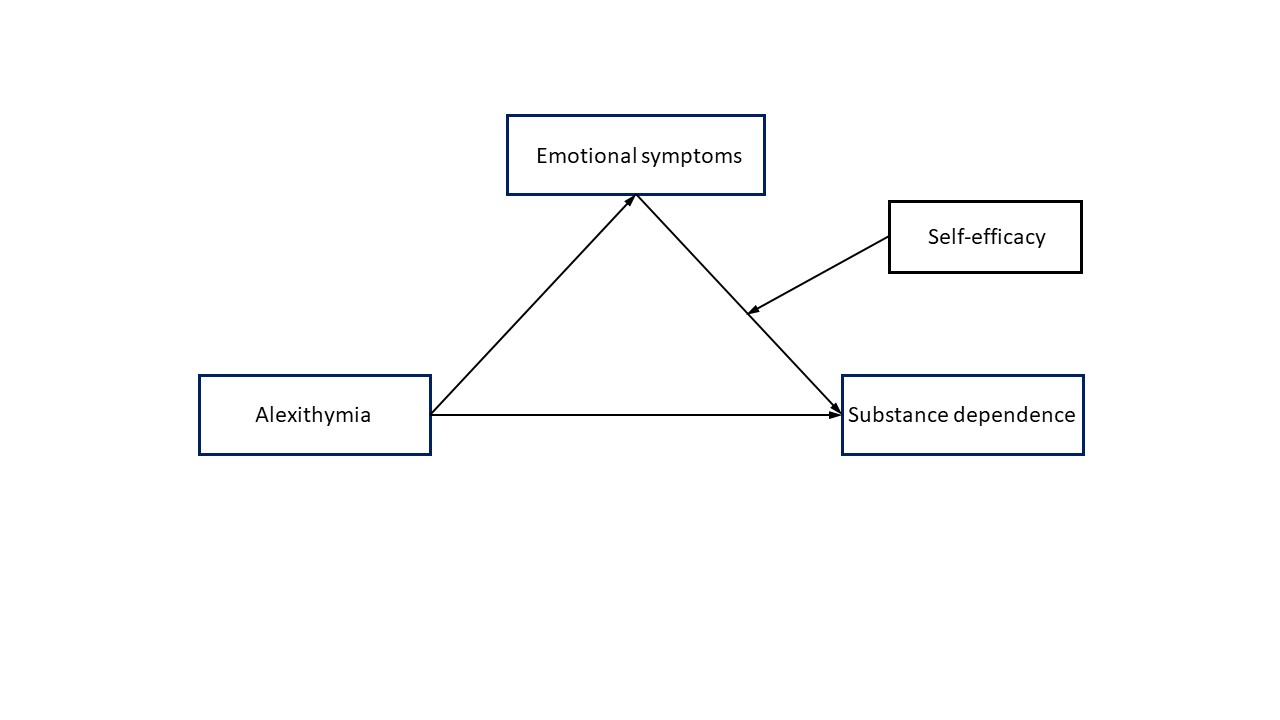


**Supplementary figure 4.** Distribution plots for three differently moderated effects of family support on the association between alexithymia, emotional symptoms, and substance dependence


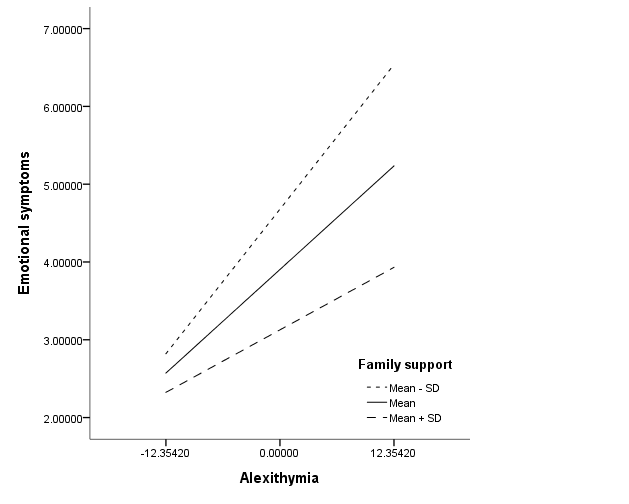


**Supplementary figure 5.** Distribution plots for three differently moderated effects of self-efficacy on the association between alexithymia, emotional symptoms, and substance dependence


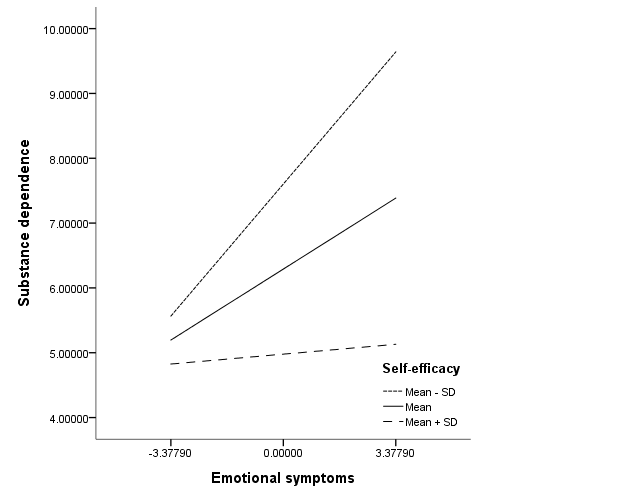

Supplement: Supplementary file 1 [file get_supplementary_file.php]
